# Supplementary material for: 21-nt phasiRNAs direct target mRNA cleavage in rice male germ cells
Source: PubMed Central journal article supplement (PMC7562718; doi:10.1038/s41467-020-19034-y), 2020-10-15
Supplement: 41467_2020_19034_MOESM3_ESM.pdf [file 41467_2020_19034_MOESM3_ESM.pdf]

## **Descriptions of Additional Supplementary Files**

### **Supplementary Data 1**

**Description:** Sequencing datasets generated in this study

### **Supplementary Data 2**

**Description:** A catalogue of 21- and 24-nt PHAS loci

### **Supplementary Data 3**

**Description:** Abundances of phasiRNAs in embryos, spikelets and germ cells

### **Supplementary Data 4**

**Description:** Abundances of phasiRNAs in early prophase I meiocytes of *osrd6-2* and *mel1-4* and their respective wild-type plants

### **Supplementary Data 5**

**Description:** 21-nt phasiRNA targets validated by degradome sequencing

### **Supplementary Data 6**

**Description:** Degradome counts at cleavage sites of validated 21-nt phasiRNA targets in *osrd6-2*, *mel1-4* and their respective wild-type plants

### **Supplementary Data 7**

**Description:** Expression levels of validated 21-nt phasiRNA targets in the early prophase I meiocytes of *osrd6-2* and *mel1-4* and their respective wild-type plants
